# Supplementary material for: Blood Levels of Free-Circulating Mitochondrial DNA in Septic Shock and Postsurgical Systemic Inflammation and Its Influence on Coagulation: A Secondary Analysis of a Prospective Observational Study
Source: PubMed Central journal article supplement (PMC7408641; doi:10.3390/jcm9072056), 2020-06-30
Supplement: jcm-09-02056-s001.pdf [file jcm-09-02056-s001.pdf]

**Supplementary Table 1:** The results of the inflammatory parameters as presented in [8].

|                                             |       | Septic Shock<br>[n = 20]      | Cardiac Surgery<br>[CABG, n = 20]                                            | Major Abdominal Surgery<br>[MAS, n = 20]                                   | Control Patients<br>[CTRL, n = 20]      |
|---------------------------------------------|-------|-------------------------------|------------------------------------------------------------------------------|----------------------------------------------------------------------------|-----------------------------------------|
| <b>Leucocytes (L<sup>-1</sup>)</b>          | onset | 11.9 [7.1–19.7]               | Preop<br>8.1 [6.6–9.4]                                                       | Preop<br>7.6 [6–9]                                                         | Ctrl<br>5.9 [5.3–7.9]                   |
|                                             | 24 h  | 13.5 [9.3–20.9]               | Postop<br>11 [7.9–15]                                                        | Postop<br>10.3 [9.4–12.5]                                                  |                                         |
|                                             | 72 h  | 14.2 [10.7–17.3]              | 24 h<br>10.7 [8.2–12.2]<br>72 h<br>10.6 [8.2–11.8]                           | 24 h<br>11.5 [9.3–12.9]<br>72 h<br>7.4 [6.5–11.6]                          |                                         |
| <b>CRP (mg x L<sup>-1</sup>)</b>            | onset | 229.5 [117.2–277.3]           | Preop<br>3.8 [1.9–10.6]                                                      | Preop<br>5.1 [1.7–10.3]                                                    | Ctrl<br>1.1 [0–6.4]                     |
|                                             | 24 h  | 244.6 [166.5–287.7]           | Postop<br>4.3 [2.6–9.2]                                                      | Postop<br>6.5 [2.5–11.4]                                                   |                                         |
|                                             | 72 h  | 236.5 [139.5–268.8]           | 24 h<br>75.1 [67.2–109.8]<br>72 h<br>202.4 [156.3–241.2]                     | 24 h<br>68 [46.6–88.5]<br>72 h<br>149 [115.7–200]                          |                                         |
| <b>PCT (µg x L<sup>-1</sup>)</b>            | onset | 9.2 [5.2–38.1]                | Preop<br>0.2 [0.1–0.2]                                                       | Preop<br>N.A.                                                              | Ctrl<br>N.A.                            |
|                                             | 24 h  | 10.4 [4.9–29.2]               | Postop<br>N.A.                                                               | Postop<br>0.6 [0.4–0.7]                                                    |                                         |
|                                             | 72 h  | 7 [2.2–25.6]                  | 24 h<br>N.A.<br>72 h<br>1.6 [1.6]                                            | 24 h<br>0.7 [0.3–0.9]<br>72 h<br>0.8 [0.4–0.9]                             |                                         |
| <b>NETs (%)</b>                             | onset | 3.2 [2.3–4.2]                 | Preop<br>2 [1.7–2.6]                                                         | Preop<br>2.6 [1.7–3.3]                                                     | Ctrl<br>1.6 [1–2]                       |
|                                             | 24 h  | 2.5 [1.8–3.7]                 | Postop<br>3.5 [2.7–4.6]                                                      | Postop<br>2.9 [2.3–5.2]                                                    |                                         |
|                                             | 72 h  | 2.3 [1–3.8]                   | 24 h<br>2.7 [2.1–3.5]<br>72 h<br>2.8 [2.1–3.8]                               | 24 h<br>2.6 [2–3.8]<br>72 h<br>2.7 [2.3–3.9]                               |                                         |
| <b>HMGB1 (pg x mL<sup>-1</sup>)</b>         | onset | 40,332.1 [25,079.6–51,674.9]  | Preop<br>25,241.3 [20,953.1–46,031.4]                                        | Preop<br>31,126.8 [20,032.8–38,097.8]                                      | Ctrl<br>26,297.5 [22,149.3–34,710.9]    |
|                                             | 24 h  | 32,692.3 [21,563.6–50,421.8]  | Postop<br>23,982.5 [17,353.2–49,133.1]                                       | Postop<br>25,343.5 [21,913.1–41,784.2]                                     |                                         |
|                                             | 72 h  | 25,496.2 [23,125.4–33,421.3]  | 24 h<br>30,440.2 [22,238.5–41,098.5]<br>72 h<br>26,584.3 [20,870.2–38,988.1] | 24 h<br>28,800.1 [21,687.7–39,665.6]<br>72 h<br>21,780.6 [16,867–34,755.6] |                                         |
| <b>MPO (ng x mL<sup>-1</sup>)</b>           | onset | 700,905.7 [285,135.5–886,644] | Preop<br>438,502.8 [341,657.5–638,995.4]                                     | Preop<br>367,381.5 [187,582–499,310.8]                                     | Ctrl<br>214,472.6 [136,124.2–296,626.7] |
|                                             | 24 h  | 542,611.2 [303,891–832,728.9] | Postop<br>595,820.4 [275,593.4–892,010.7]                                    | Postop<br>713,023.1 [433,356.9–913,219.4]                                  |                                         |
|                                             | 72 h  | 498,553 [381,058.9–610,573.3] | 529,317.3 [306,869.6–885,046]                                                | 72 h<br>351,888.5 [235,179.9–711,455.7]                                    |                                         |
| <b>Interleukin 8 (pg x mL<sup>-1</sup>)</b> | onset | 470.4 [105.9–1462.30]         | Preop<br>39.2 [26.1–49]                                                      | Preop<br>35 [20.4–49.8]                                                    | Ctrl<br>35.8 [25–40.5]                  |
|                                             | 24 h  | 206.6 [100.1–489.9]           | Postop<br>85.3 [57.7–127.9]                                                  | Postop<br>71.1 [58.2–129.1]                                                |                                         |
|                                             | 72 h  | 165.1 [90.2–195.5]            | 24 h<br>67.1 [40.7–99]<br>72 h<br>55.2 [42.9–72.2]                           | 24 h<br>60.9 [41.2–110.4]<br>72 h<br>41.9 [27.1–63.6]                      |                                         |

Data are shown as medians (IQR). CRP: C–Reactive Protein; DNA: Deoxynucleic Acid; HMGB1: high mobility group protein B1; MPO: myeloperoxidase; NETs: neutrophil extracellular traps; PCT: procalcitonin.
